# Supplementary material for: Insights into Ti3N2T2/VS2 (T = F, O, OH) heterostructures as innovative anode materials for lithium/sodium/magnesium-ion batteries
Source: Royal Society of Chemistry journal article supplement (doi:10.1039/d4ta02761b), 2024-01-01
Supplement: d4ta02761b1.pdf [file d4ta02761b1.pdf]

## Supplementary Information

# Insights into $\text{Ti}_3\text{N}_2\text{T}_2/\text{VS}_2$ (T = F, O, OH) heterostructures as innovative anode materials for lithium/sodium/magnesium-ion batteries

Feng-Ming Ma,<sup>a</sup> Xiao-Meng Zhao,<sup>a</sup> Han-Bai Luo,<sup>a</sup> Chun-Liang Shang,<sup>a</sup> Hui-Min Gao,<sup>b</sup> Xiao-Lin Wang<sup>\*a</sup>

<sup>a</sup> Key Laboratory of Cluster Science of the Ministry of Education, Beijing Key Laboratory of Photoelectronic/Electrophotonic Conversion Materials, School of Chemistry and Chemical Engineering, Beijing Institute of Technology, Beijing 102488, China

<sup>b</sup> State Key Laboratory of Supramolecular Structure and Materials, Institute of Theoretical Chemistry, Jilin University, Changchun, 130023, China

\* Email: wangxl614@bit.edu.cn

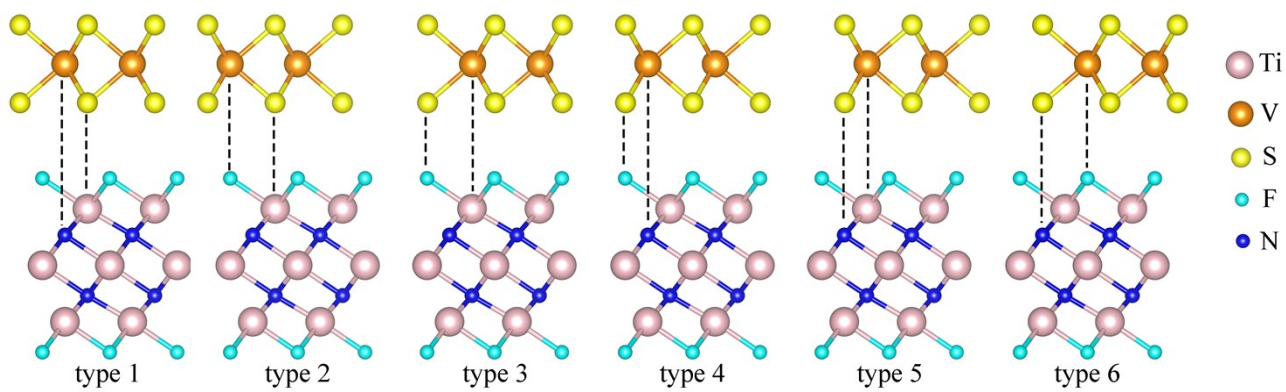

**Fig. S1** Side views of the initial  $\text{Ti}_3\text{N}_2\text{F}_2/\text{VS}_2$  heterostructures with six stacking patterns.

**Table S1** Binding energies  $E_b$  (eV) and interlayer distances  $d$  (Å) of the optimized  $\text{Ti}_3\text{N}_2\text{T}_2/\text{VS}_2$  (T = F, O, OH) heterostructures with different stacking patterns.

| Heterostructure                                  | Pattern | $E_b$ | $d$  |
|--------------------------------------------------|---------|-------|------|
| $\text{Ti}_3\text{N}_2\text{F}_2/\text{VS}_2$    | type 1  | -0.75 | 2.68 |
|                                                  | type 2  | -0.74 | 2.69 |
|                                                  | type 3  | -0.49 | 3.11 |
|                                                  | type 4  | -0.49 | 3.11 |
|                                                  | type 5  | -0.72 | 2.70 |
|                                                  | type 6  | -0.71 | 2.75 |
| $\text{Ti}_3\text{N}_2\text{O}_2/\text{VS}_2$    | type 1  | -0.69 | 2.71 |
|                                                  | type 2  | -0.71 | 2.72 |
|                                                  | type 3  | -0.45 | 3.09 |
|                                                  | type 4  | -0.44 | 3.12 |
|                                                  | type 5  | -0.69 | 2.73 |
|                                                  | type 6  | -0.67 | 2.78 |
| $\text{Ti}_3\text{N}_2(\text{OH})_2/\text{VS}_2$ | type 1  | -3.14 | 1.78 |
|                                                  | type 2  | -3.17 | 1.74 |
|                                                  | type 3  | -3.45 | 1.93 |
|                                                  | type 4  | -3.46 | 1.92 |
|                                                  | type 5  | -3.10 | 1.79 |
|                                                  | type 6  | -3.14 | 1.76 |

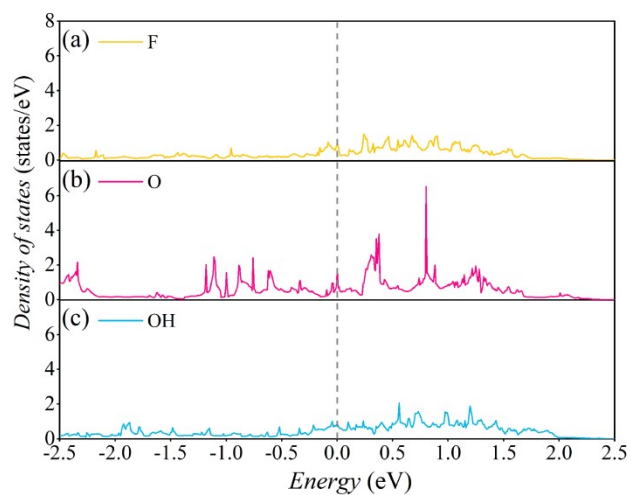

**Fig. S2** Density of states of (a) F termination of  $\text{Ti}_3\text{N}_2\text{F}_2/\text{VS}_2$ , (b) O termination of  $\text{Ti}_3\text{N}_2\text{O}_2/\text{VS}_2$  and (c) OH termination of  $\text{Ti}_3\text{N}_2(\text{OH})_2/\text{VS}_2$ , where the Fermi levels are set to zero.

**Table S2** Adsorption energies  $E_{\text{ad}}$  (eV) and change rates of interlayer distances  $\Delta d/d$  (%) of individual ions absorbed on the optimal  $\text{Ti}_3\text{N}_2\text{T}_2/\text{VS}_2$  (T = F, O, OH) heterostructures.

| Heterostructure                                  | Site | Li              |              | Na              |              | Mg              |              |
|--------------------------------------------------|------|-----------------|--------------|-----------------|--------------|-----------------|--------------|
|                                                  |      | $E_{\text{ad}}$ | $\Delta d/d$ | $E_{\text{ad}}$ | $\Delta d/d$ | $E_{\text{ad}}$ | $\Delta d/d$ |
| $\text{Ti}_3\text{N}_2\text{F}_2/\text{VS}_2$    | T1   | -0.72           | 0.13         | -0.84           | -0.69        | 0.43            | -0.51        |
|                                                  | T2   | -1.74           | 1.50         | -1.46           | 0.42         | -0.57           | 1.25         |
|                                                  | T3   | -1.59           | 1.49         | -1.43           | 0.38         | -0.44           | 1.22         |
|                                                  | M1   | -1.50           | 26.46        | -1.31           | 50.66        | -0.78           | 28.71        |
|                                                  | M2   | -1.88           | 19.02        | -1.59           | 48.06        | -1.34           | 28.61        |
|                                                  | M3   | -2.07           | 8.43         | -1.84           | 35.33        | -1.82           | 11.43        |
|                                                  | B1   | -0.43           | 0.02         | -0.24           | -0.51        | 1.56            | -0.61        |
|                                                  | B2   | 0.33            | -0.24        | 0.11            | -0.76        | 1.37            | -0.53        |
|                                                  | B3   | -0.35           | -0.65        | -0.24           | 0.32         | 1.55            | -0.76        |
| $\text{Ti}_3\text{N}_2\text{O}_2/\text{VS}_2$    | T1   | -0.76           | -0.14        | -0.88           | -0.93        | 0.43            | -0.68        |
|                                                  | T2   | -1.75           | -0.01        | -1.48           | -1.13        | -0.53           | -0.28        |
|                                                  | T3   | -1.59           | 1.00         | -1.45           | 0.08         | -0.40           | 0.85         |
|                                                  | M1   | -2.08           | 27.22        | -1.96           | 53.78        | -2.35           | 29.83        |
|                                                  | M2   | -2.39           | 22.34        | -2.01           | 55.43        | -2.46           | 30.06        |
|                                                  | M3   | -2.53           | 9.49         | -2.31           | 37.36        | -3.14           | 13.87        |
|                                                  | B1   | -1.86           | 0.06         | -1.64           | -0.34        | -0.85           | -0.16        |
|                                                  | B2   | -0.95           | 0.32         | -0.83           | 0.00         | 0.58            | -0.04        |
|                                                  | B3   | -1.62           | -0.03        | -1.49           | -0.37        | -0.44           | -0.23        |
| $\text{Ti}_3\text{N}_2(\text{OH})_2/\text{VS}_2$ | T1   | -0.66           | -0.44        | -0.82           | -0.77        | 0.42            | 0.35         |
|                                                  | T2   | -1.72           | -0.19        | -1.42           | -0.89        | -0.59           | -0.18        |
|                                                  | T3   | -1.55           | -0.11        | -1.39           | -0.80        | -0.44           | 0.06         |
|                                                  | M1   | -0.82           | 2.62         | -0.16           | 11.47        | 0.23            | 6.14         |
|                                                  | M2   | a               | a            | a               | a            | a               | a            |
|                                                  | M3   | -1.06           | 1.63         | -0.38           | 9.61         | -0.15           | 4.34         |
|                                                  | B1   | 0.21            | 0.21         | 0.38            | 0.13         | 1.53            | -0.15        |
|                                                  | B2   | 0.72            | -0.02        | 0.14            | -0.12        | 1.15            | -0.03        |
|                                                  | B3   | 0.47            | -0.13        | 0.42            | -0.31        | 1.04            | 0.01         |

<sup>a</sup> A metal ion was initially located at the M2 site, but was adsorbed at the M3 site after optimization.

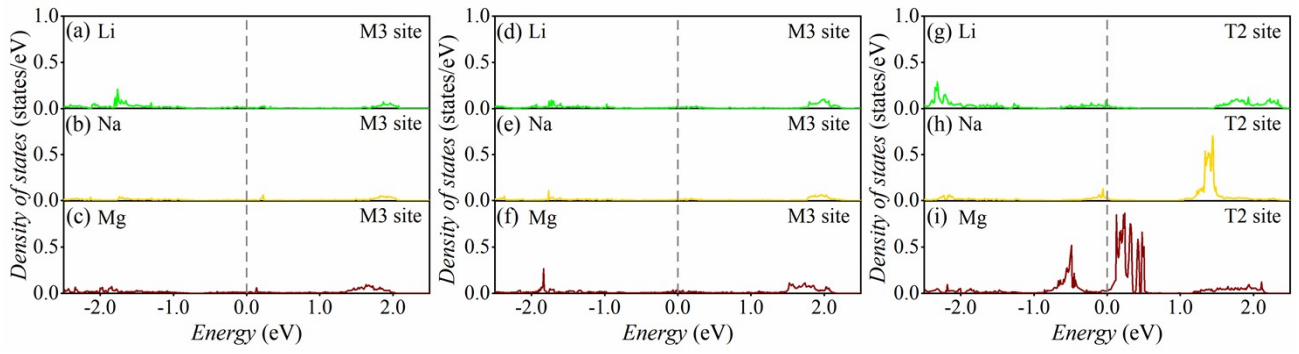

**Fig. S3** Total density of states of each adsorbed ion derived from (a)–(c)  $\text{Ti}_3\text{N}_2\text{F}_2/\text{VS}_2$  adsorption systems, (d)–(f)  $\text{Ti}_3\text{N}_2\text{O}_2/\text{VS}_2$  adsorption systems and (g)–(i)  $\text{Ti}_3\text{N}_2(\text{OH})_2/\text{VS}_2$  adsorption systems. All the Fermi levels are shifted to zero for comparison.

**Table S3** The Fermi levels (eV) of the most stable pristine and single ion-adsorbed  $\text{Ti}_3\text{N}_2\text{T}_2/\text{VS}_2$  (T = F, O, OH) heterostructures.

| Heterostructure                                  | No ion | Li    | Na    | Mg    |
|--------------------------------------------------|--------|-------|-------|-------|
| $\text{Ti}_3\text{N}_2\text{F}_2/\text{VS}_2$    | -0.73  | -0.66 | -0.59 | -0.47 |
| $\text{Ti}_3\text{N}_2\text{O}_2/\text{VS}_2$    | -1.11  | -1.00 | -0.92 | -0.87 |
| $\text{Ti}_3\text{N}_2(\text{OH})_2/\text{VS}_2$ | 0.19   | 0.87  | 1.23  | 1.10  |

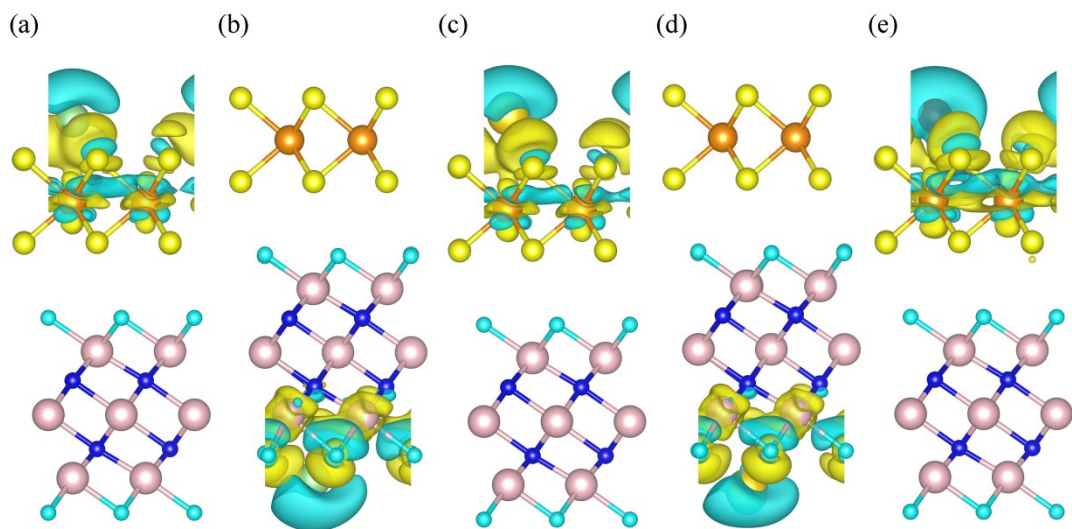

**Fig. S4** Charge density difference of individual Li/Na/Mg ions adsorbed at the most favorable sites of the upper and lower surfaces of  $\text{Ti}_3\text{N}_2\text{F}_2/\text{VS}_2$ . (a)  $\text{Li}^+$ , (c)  $\text{Na}^+$  and (e)  $\text{Mg}^{2+}$  bound to the T2 site, and (b)  $\text{Li}^+$ , (d)  $\text{Na}^+$  bound to the B1 site, respectively. The yellow and cyan represent charge accumulation and depletion, respectively. The isosurface value is set to  $0.008 e \text{ \AA}^{-3}$ .



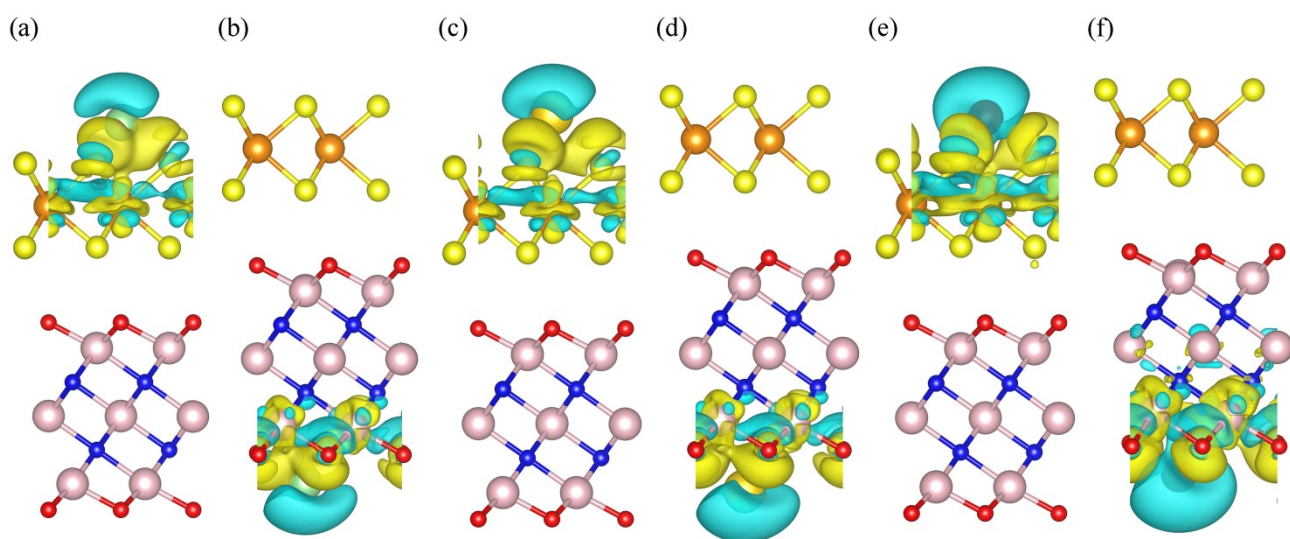

**Fig. S5** Charge density difference of individual Li/Na/Mg ions adsorbed at the most favorable sites of the upper and lower surfaces of  $\text{Ti}_3\text{N}_2\text{O}_2/\text{VS}_2$ . (a)  $\text{Li}^+$ , (c)  $\text{Na}^+$  and (e)  $\text{Mg}^{2+}$  bound to the T2 site, and (b)  $\text{Li}^+$ , (d)  $\text{Na}^+$  and (f)  $\text{Mg}^{2+}$  bound to the B1 site, respectively. The yellow and cyan represent charge accumulation and depletion, respectively. The isosurface value is set to  $0.008 e \text{ \AA}^{-3}$ .

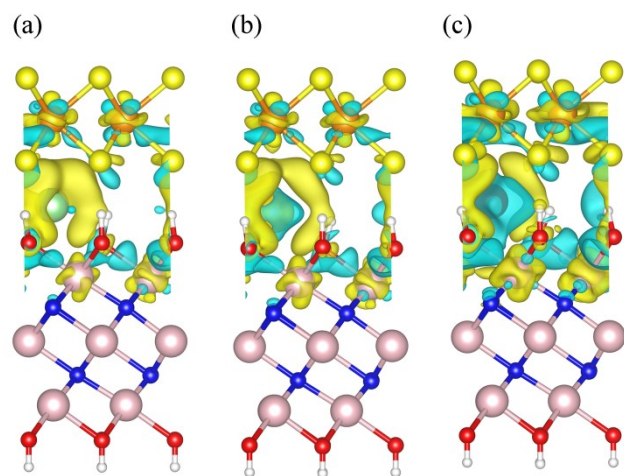

**Fig. S6** Charge density difference of (a) Li<sup>+</sup>, (b) Na<sup>+</sup> and (c) Mg<sup>2+</sup> adsorbed at the most favorable M3 site of the interlayer of Ti<sub>3</sub>N<sub>2</sub>(OH)<sub>2</sub>/VS<sub>2</sub>, respectively. The yellow and cyan represent charge accumulation and depletion, respectively. The isosurface value is set to 0.008  $e \text{ \AA}^{-3}$ .

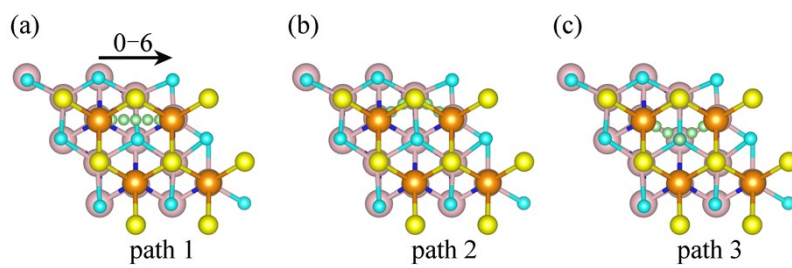

**Fig. S7** Top views of three diffusion paths of a metal ion (green ball) between two adjacent M3 sites of  $\text{Ti}_3\text{N}_2\text{F}_2/\text{VS}_2$ . Each path contains seven images marked as 0–6 from left to right.

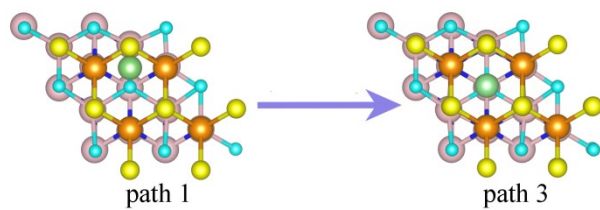

**Fig. S8** Ion position (green ball) in the fourth image changes after optimization, causing the diffusion path of each ion at the interface of  $\text{Ti}_3\text{N}_2\text{F}_2/\text{VS}_2$  to transform from linear path to fold-line path.

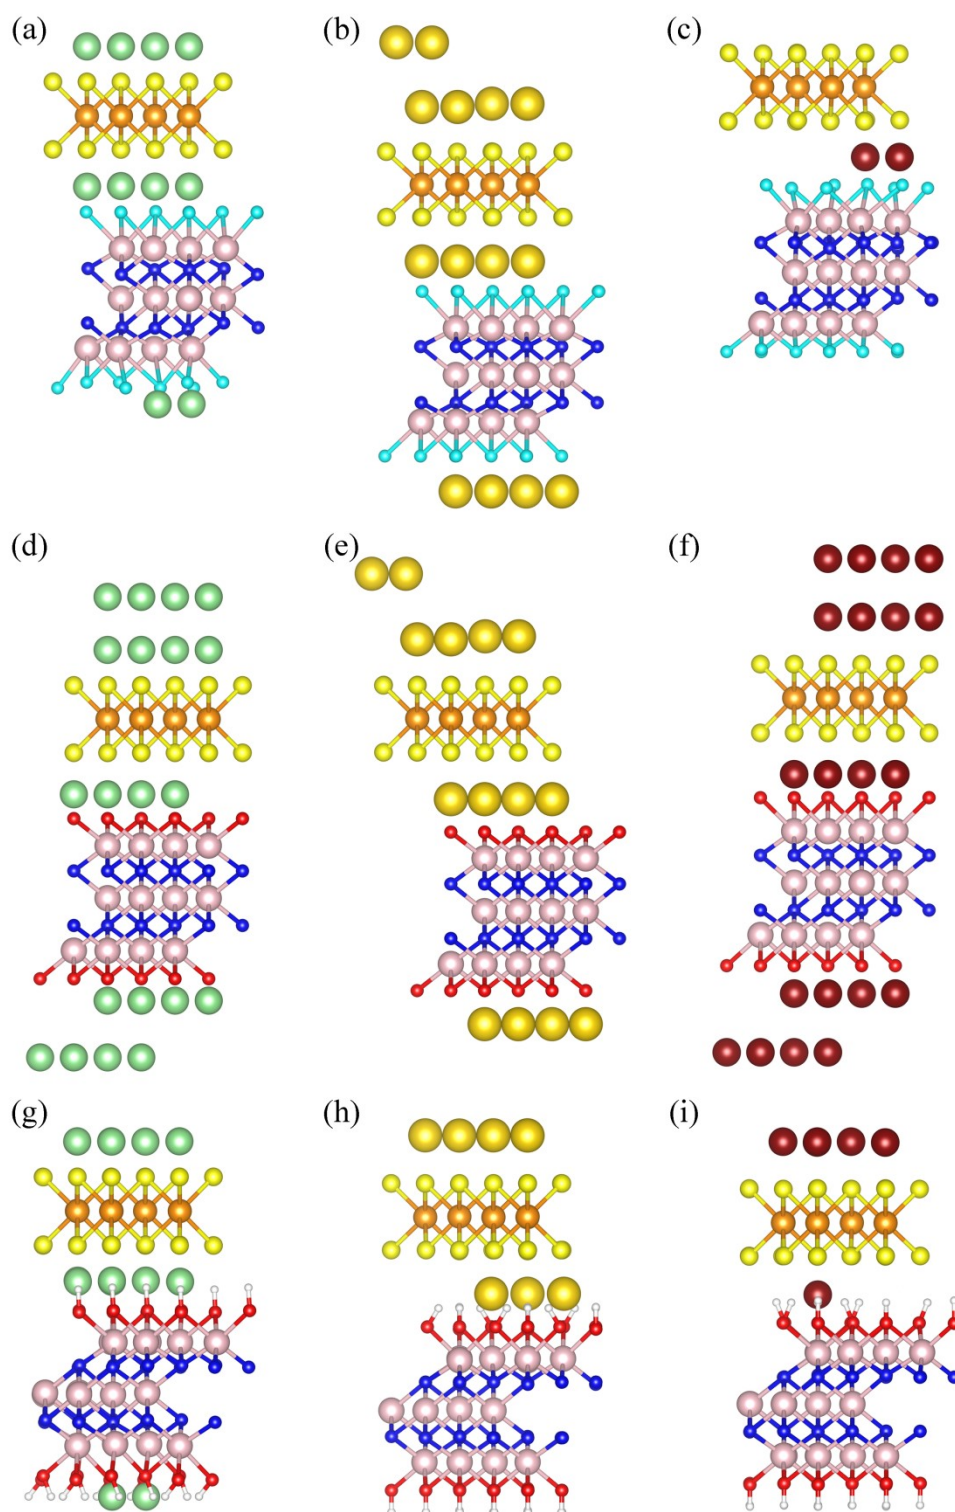

**Fig. S9** Structures corresponding to the maximum load concentrations of Li/Na/Mg ions adsorbed on  $\text{Ti}_3\text{N}_2\text{T}_2/\text{VS}_2$  ( $\text{T} = \text{F}, \text{O}, \text{OH}$ ). Side views of (a)  $\text{Ti}_3\text{N}_2\text{F}_2/\text{VS}_2\text{Li}_{2.5}$ , (b)  $\text{Ti}_3\text{N}_2\text{F}_2/\text{VS}_2\text{Na}_{3.5}$ , (c)  $\text{Ti}_3\text{N}_2\text{F}_2/\text{VS}_2\text{Mg}_{0.5}$ , (d)  $\text{Ti}_3\text{N}_2\text{O}_2/\text{VS}_2\text{Li}_5$ , (e)  $\text{Ti}_3\text{N}_2\text{O}_2/\text{VS}_2\text{Na}_{3.5}$ , (f)  $\text{Ti}_3\text{N}_2\text{O}_2/\text{VS}_2\text{Mg}_5$ , (g)  $\text{Ti}_3\text{N}_2(\text{OH})_2/\text{VS}_2\text{Li}_{2.5}$ , (h)  $\text{Ti}_3\text{N}_2(\text{OH})_2/\text{VS}_2\text{Na}_{1.75}$ , (i)  $\text{Ti}_3\text{N}_2(\text{OH})_2/\text{VS}_2\text{Mg}_{1.25}$ .

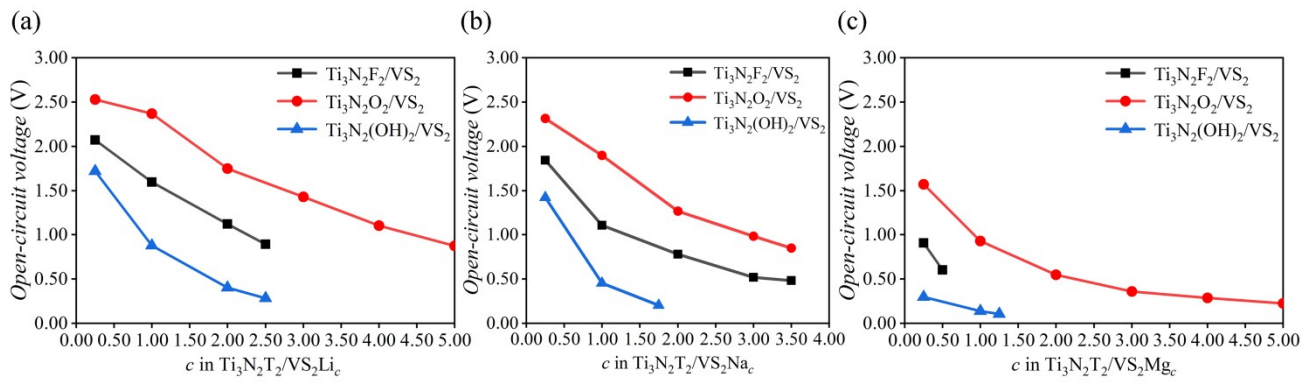

**Fig. S10** OCV as a function of the stoichiometric ratio ( $c$ ) of ion concentration in  $\text{Ti}_3\text{N}_2\text{T}_2/\text{VS}_2\text{A}_c$  for (a) LIBs, (b) SIBs, and (c) MIBs, respectively.
